# Supplementary material for: CRISPR-PCS: a powerful new approach to inducing multiple chromosome splitting in Saccharomyces cerevisiae
Source: PubMed Central journal article supplement (PMC4987674; doi:10.1038/srep30278), 2016-08-17
Supplement: srep30278-s1.pdf [file srep30278-s1.pdf]

1 **CRISPR-PCS: a powerful new approach to inducing multiple chromosome**  
2 **splitting in *Saccharomyces cerevisiae***

3

4 Yu Sasano, Koki Nagasawa, Saeed Kaboli, Minetaka Sugiyama and Satoshi Harashima

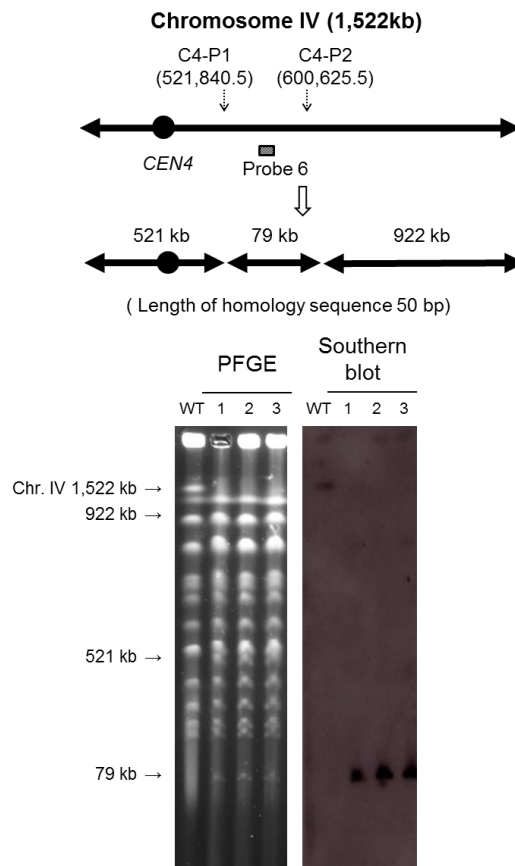

5

6

7 **Supplementary Fig. 1. One step chromosome construction by CRISPR-PCS.** The  
8 chromosomal region between C4-P1 and C4-P2 of Chr. IV was targeted to produce a  
9 mini-chromosome. A 50 bp homology sequence was used in the splitting modules. The  
10 splitting modules of C4-P1 and C4-P2 were marked with *CgHIS3* and *CgLEU2*,  
11 respectively. Left panel, PFGE analysis of wild type FY834-Cas9 and three randomly  
12 chosen transformants. Right panel, Southern blot analysis after PFGE using probe 6 for  
13 detection of the newly generated chromosome.

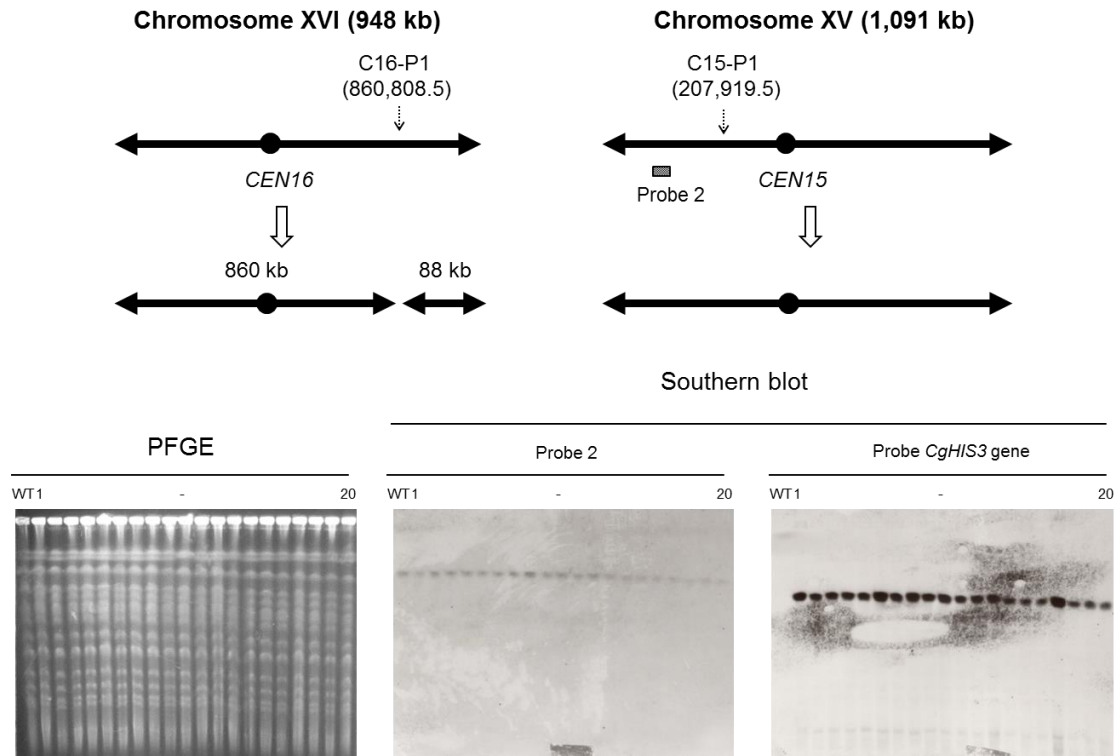

14

15

16 **Supplementary Fig. 2. Karyotype analysis of transformants that were not split at**

17 **Chr. XV.** Simultaneous double splitting in different chromosomes was performed at

18 the position C16-P1 of Chr. XVI and position C15-P1 of Chr. XV by CRISPR-PCS.

19 The splitting modules of C15-P1 and C16-P1 were marked with *CgHIS3* and *CgLEU2*,

20 respectively. A 50 bp homology sequence was used in the splitting modules. Among

21  $\text{Leu}^+ \text{His}^+$  Transformants, we isolated 20 transformants that did not have expected

22 splitting at Chr. XV checked by colony direct PCR. Left panel, PFGE analysis of wild

23 type FY834-Cas9 and 20 transformants that were not split at Chr. XV; Middle panel,

24 Southern blot analysis after PFGE using probe 2; Right panel, Southern blot analysis

25 after PFGE using *CgHIS3* gene probe. *CgHIS3* gene probe was prepared by PCR using

26 oligonucleotide pairs loxP cassette and short CA primer and p3009 as a template.

27

28 Table S1. Positions of splitting points on different chromosomes

| Name   | Chromosome | Nucleotide position | gRNA targeting sequence (5'-3') <sup>a</sup> |
|--------|------------|---------------------|----------------------------------------------|
| C4-P1  | Chr. IV    | 521,840.5           | AAAACGATCACGCCGGTGAC <u>AGG</u>              |
| C4-P2  | Chr. IV    | 600,625.5           | GCTGGGGTAGAACTAGAGTA <u>AGG</u>              |
| C4-P3  | Chr. IV    | 999,122.5           | ACGTGGTAGAACGTTAGGTG <u>AGG</u>              |
| C12-P1 | Chr. XII   | 1,021,058.5         | AATAAAAGACGTGGCGCTCAC <u>GG</u>              |
| C12-P2 | Chr. XII   | 1,051,687.5         | TGTGACCCTCAAAGTTTGGT <u>TGG</u>              |
| C15-P1 | Chr. XV    | 207,919.5           | TTTCATCAACACCAGCCTAT <u>GGG</u>              |
| C16-P1 | Chr. XVI   | 860,808.5           | GGGAAGAATACAACGCTCAAC <u>GG</u>              |

29 <sup>a</sup>PAM sequence is underlined.

30

31 Table S2. Relationship between the amount of gRNA expression plasmid and splitting  
 32 efficiency

| <b>Splitting point</b> | <b>Amount of gRNA expression plasmid (<math>\mu\text{g}</math>)</b> | <b>No. of transformants</b> | <b>No. of transformants subjected to karyotype analysis</b> | <b>No. of transformants with expected splitting</b> |
|------------------------|---------------------------------------------------------------------|-----------------------------|-------------------------------------------------------------|-----------------------------------------------------|
| C16-P1                 | 0                                                                   | 36                          | 5                                                           | 4                                                   |
|                        | 0.5                                                                 | 45                          | 5                                                           | 5                                                   |
|                        | 1                                                                   | 84                          | 5                                                           | 5                                                   |
|                        | 3                                                                   | 165                         | 5                                                           | 5                                                   |
|                        | 7.5                                                                 | 235                         | 5                                                           | 5                                                   |
|                        | 15                                                                  | 108                         | 5                                                           | 5                                                   |

33

34

35

36 Table S3. Relationship between length of homology sequence in splitting module and  
 37 splitting efficiency in CRISPR-PCS

| <b>Splitting point</b> | <b>Length of homology sequence (bp)</b> | <b>No. of transformants</b> | <b>No. of transformants subjected to karyotype analysis</b> | <b>No. of transformants with expected splitting</b> |
|------------------------|-----------------------------------------|-----------------------------|-------------------------------------------------------------|-----------------------------------------------------|
|                        | 75                                      | 451                         | 5                                                           | 5                                                   |
| C16-P1                 | 50                                      | 610                         | 5                                                           | 5                                                   |
|                        | 25                                      | 28                          | 5                                                           | 5                                                   |

38

39

40 Table S4. Oligonucleotide primers used in this study

| Name                                            | Sequence (5`-3`)                                                            |
|-------------------------------------------------|-----------------------------------------------------------------------------|
| <b>For gRNA expression plasmid construction</b> |                                                                             |
| C4-P1-forward                                   | AAAACGATCACGCCGGTGACGTTTTAGAGCTAGAAATAGCAAG                                 |
| C4-P1-reverse                                   | GTCACCGGCGTGATCGTTTTGATCATTATCTTTCACTGCGGA                                  |
| C4-P2-forward                                   | GCTGGGGTAGAACTAGAGTAGTTTTAGAGCTAGAAATAGCAAG                                 |
| C4-P2-reverse                                   | TACTCTAGTTCTACCCCAGCGATCATTATCTTTCACTGCGGA                                  |
| C4-P3-forward                                   | ACGTGGTAGAACGTTAGGTGGTTTTAGAGCTAGAAATAGCAAG                                 |
| C4-P3-reverse                                   | CACCTAACGTTCTACCACGTGATCATTATCTTTCACTGCGGA                                  |
| C12-P1-forward                                  | AATAAAAGACGTGGCGCTCAGTTTTAGAGCTAGAAATAGCAAG                                 |
| C12-P1-reverse                                  | TGAGCGCCACGTCTTTTATTGATCATTATCTTTCACTGCGGA                                  |
| C12-P2-forward                                  | TGTGACCCTCAAAGTTTGGTGTTTTAGAGCTAGAAATAGCAAG                                 |
| C12-P2-reverse                                  | ACCAAACCTTTGAGGGTCACAGATCATTATCTTTCACTGCGGA                                 |
| C15-P1-forward                                  | TTTCATCAACACCAGCCTATGTTTTAGAGCTAGAAATAGCAAG                                 |
| C15-P1-reverse                                  | ATAGGCTGGTGTGATGAAAGATCATTATCTTTCACTGCGGA                                   |
| C16-P1-forward                                  | GGGAAGAATAACAACGCTCAAGTTTTAGAGCTAGAAATAGCAAG                                |
| C16-P1-reverse                                  | TTGAGCGTTGTATTCTTCCCAGATCATTATCTTTCACTGCGGA                                 |
| URA3-deletion-forward                           | CACGTTCTTAATAGTGGACTCGCACTCTCAGTACAATCTGC                                   |
| URA3-deletion-reverse                           | GAGTCCACTATTAAGAACGTG                                                       |
| <b>For construction of splitting module</b>     |                                                                             |
| CA primer                                       | CCCCAACCCCAACCCCAACCCCAACCCCAACCCCAAAAGGCCACTAGTGGATCTGAT                   |
| loxP cassette                                   | GGCCGCCAGCTGAAGCTTCG                                                        |
| C4-P1-left-50bp                                 | CGTTACAAGAACACTTTATAGCATTATGTTTCATTA AAAACGATCACGCCGGGCGCCAGCT<br>GAAGCTTCG |

|                      |                                                                            |
|----------------------|----------------------------------------------------------------------------|
| C4-P1-right-50bp     | TAATGGATCATAACCTTTGATTCTCCAGTCTTCCAAGCGTTTCCTGTACGGCCGCCAGCT<br>GAAGCTTCG  |
| C4-P2-left-50bp      | CCCAGTCGCATTATTTTTAGATTGGCCGTAGGGGCTGGGGTAGAACTAGAGGCCGCCAGC<br>TGAAGCTTCG |
| C4-P2-right-50bp     | GTCAGGTATTTATATGACAGTTCAAAAGAGGGCAGAGCAATGTTCTTACGGCCGCCAGC<br>TGAAGCTTCG  |
| C4-P3-left-50bp      | CAAGCTCCTGTATTTGCTCTTTACTACAGGAAGACGTGGTAGAACGTTAGGGCCGCCAGC<br>TGAAGCTTCG |
| C4-P3-right-50bp     | AAGTCTGGTACCCTTCTATTAGTGTATGTCAAGTCAACATATTCCTCACGGCCGCCAGCT<br>GAAGCTTCG  |
| C12-P1-left-forward  | CTCTTCAGATGAAGAGCATG                                                       |
| C12-P1-left-inverse  | CTGCAGCGTACGAAGCTTCAGCTGGCGGCCCGCTCACGGAAGCGAATTGA                         |
| C12-P1-right-forward | CTGCAGCGTACGAAGCTTCAGCTGGCGGCCCCACGTCTTTTATTTACTGGT                        |
| C12-P1-right-inverse | TGGAAATATACCGTCTCAGC                                                       |
| C12-P2-left-forward  | CTTGGGATGTTGATAAGCCT                                                       |
| C12-P2-left-inverse  | CTGCAGCGTACGAAGCTTCAGCTGGCGGCCTGGACAATCTTAAAGTCGGG                         |
| C12-P2-right-forward | CTGCAGCGTACGAAGCTTCAGCTGGCGGCCACCAAACCTTTGAGGGTCACA                        |
| C12-P2-right-inverse | GGGCATTACTAATGGAAGAC                                                       |
| C12-P1-left-50bp     | CTTGAATGTGGATTTTTCTAATTTTACTGCTCAATTCGCTTCCGTGAGCGGGCCGCCAGCT<br>GAAGCTTCG |
| C12-P1-right-50bp    | AGTTCAGAAAGTTCTGATGAAGCAATAATACCAGTAAATAAAAGACGTGGGGCCGCCAGC<br>TGAAGCTTCG |
| C12-P2-left-50bp     | GGCTAACGTTACTAACTTTGTTTTCAATTTCCCGACTTTAAGATTGTCCAGGCCGCCAGCT<br>GAAGCTTCG |
| C12-P2-right-50bp    | TAAACTTTTTTAAGGGCAAGTAATAGATCTGTGACCCTCAAAGTTTGGTGGCCGCCAGCT               |

|                      |                                                               |
|----------------------|---------------------------------------------------------------|
|                      | GAAGCTTCG                                                     |
| C15-P1-left-forward  | GTCCGCAAATATCACCCATG                                          |
| C15-P1-left-inverse  | CTGCAGCGTACGAAGCTTCAGCTGGCGGCCAGGCTGGTGTTGATGAAAGC            |
| C15-P1-right-forward | CTGCAGCGTACGAAGCTTCAGCTGGCGGCCATGGGCTGTGGTTAGGAAGA            |
| C15-P1-right-inverse | TATGGTACAACACCGATGCC                                          |
| C15-P1-left-50 bp    | TGAGTTGCTGATATAATTATGAGTGGATTTGCTTTCATCAACACCAGCCTGGCCGCCAGCT |
|                      | GAAGCTTCG                                                     |
| C15-P1-right-50 bp   | ATCAACTATCCGAAATGCACGACGAGTTCCTTCTCCTAACACAGCCCATGGCCGCCAGCT  |
|                      | GAAGCTTCG                                                     |
| C16-P1-left-forward  | TCCAACGTTGCCATCGTTGG                                          |
| C16-P1-left-reverse  | CTGCAGCGTACGAAGCTTCAGCTGGCGGCCCGTTGTATTCTTCCCCCAC             |
| C16-P1-right-forward | CTGCAGCGTACGAAGCTTCAGCTGGCGGCCCTCAACGGAAGAGGAAGCTC            |
| C16-P1-right-reverse | ACCTTCTCAATCTGTGCTTACT                                        |
| C16-P1-left-75 bp    | GCTGCCCCACAGCGGGAAGGCCCTTCAAGGGGTAGCGGCATCGCCTAGTAGCACTGTGG   |
|                      | GGGGAAGAATACAACGGGCCGCCAGCTGAAGCTTCG                          |
| C16-P1-right-75 bp   | TGTTAATTCAAAAATGTATCCTTGAAACATAGAAGGTGCTGGCTGCATCTCGCAGAGCTT  |
|                      | CCTCTCCGTTGAGGGCCGCCAGCTGAAGCTTCG                             |
| C16-P1-left-50 bp    | CAAGGGGTAGCGGCATCGCCTAGTAGCACTGTGGGGGAAGAATACAACGGGCCGCCAG    |
|                      | CTGAAGCTTCG                                                   |
| C16-P1-right-50 bp   | AAACATAGAAGGTGCTGGCTGCATCTCGCAGAGCTTCTCTCCGTTGAGGGCCGCCAGC    |
|                      | TGAAGCTTCG                                                    |
| C16-P1-left-25 bp    | GCACTGTGGGGGAAGAATACAACGGGCCGCCAGCTGAAGCTTCG                  |
| C16-P1-right-25 bp   | TCGCAGAGCTTCTCTCCGTTGAGGGCCGCCAGCTGAAGCTTCG                   |

### **For probe preparation**



|                 |                                                    |
|-----------------|----------------------------------------------------|
| Probe 1-forward | GGATTTATTGGATTGGCACG                               |
| Probe 1-reverse | CTGCAGCGTACGAAGCTTCAGCTGGCGGCCACGGATGAGTCAAACCATAG |
| Probe 2-forward | AACGCAAATACGAGCGAAAG                               |
| Probe 2-reverse | CTCTGCCGCACTAAGATATT                               |
| Probe 3-forward | ATTGAAAGCACTCTAGCTCG                               |
| Probe 3-reverse | ATTTAGACGCCTCAGATGAC                               |
| Probe 4-forward | TATGCGTTGTTCTTCAGGCA                               |
| Probe 4-reverse | CCTCTCTTATCAATTGGGCT                               |
| Probe 5-forward | GGCTCGTTTGGATCAGTTTT                               |
| Probe 5-reverse | ACAACCTGATGTAGCTGTTCC                              |
| Probe 6-forward | GCGGATCAAAAAACCATTCC                               |
| Probe 6-reverse | ACGGCAGCATTATTAACAGC                               |
| Probe 7-forward | GTGCTGCTAATAGGATTCGT                               |
| Probe 7-reverse | CATGTCTGAACACTTTATGGC                              |
| Short CA primer | AGGCCACTAGTGGATCTGAT                               |

---

41

42
